# Supplementary material for: Antimicrobial Peptides against Multidrug-Resistant Pseudomonas aeruginosa Biofilm from Cystic Fibrosis Patients
Source: PubMed Central journal article supplement (PMC9289885; doi:10.1021/acs.jmedchem.2c00270), 2022-06-27
Supplement: jm2c00270_si_001.pdf [file jm2c00270_si_001.pdf]

## Supporting Information

# Antimicrobial Peptides Against Multidrug-Resistant *Pseudomonas aeruginosa* Biofilm from Cystic Fibrosis Patients

Daniel Ben Hur<sup>†</sup>, Gal Kapach<sup>†</sup>, Naiem Ahmad Wani<sup>†</sup>, Edo Kiper<sup>†</sup>, Moshe Ashkenazi<sup>‡,¶</sup>, Gill Smollan<sup>§</sup>, Natan Keller<sup>¶,§</sup>, Ori Efrati<sup>‡,¶</sup>, Yechiel Shai<sup>\*,†</sup>

<sup>†</sup>Department of Biomolecular Sciences, Weizmann Institute of Science, Rehovot 76100, Israel

<sup>‡</sup>Pediatric Pulmonary Institute and National CF Center, Edmond and Lily Safra Children's Hospital, Sheba Medical Center, Tel Hashomer, Ramat-Gan 52621, Israel

<sup>¶</sup>Sackler Faculty of Medicine, Tel-Aviv University, Tel-Aviv 69978, Israel

<sup>¶</sup>The Department of Health Management, Ariel University, Ariel 40700, Israel.

<sup>§</sup> Microbiology Laboratories, Sheba Medical Centre, Tel Hashomer, Ramat-Gan 52621, Israel.

**\* Corresponding author**

**Email: [Yechiel.Shai@weizmann.ac.il](mailto:Yechiel.Shai@weizmann.ac.il)**

### Contents:

Table S1: *P. aeruginosa* CF isolates identification and resistance index

Table S2: Susceptibility test parameters of the phoenix system

Figure S1: Analytical HPLC chromatograms of peptides

Figure S2: Mass spectrum of peptides

Figure S3: Inhibition of clinical CF patient isolates *P. aeruginosa* biofilm formations at sub-inhibitory concentration of AMPs.

Figure S4: D,L-K<sub>6</sub>L<sub>9</sub> peptides and LL-37 degrade established clinical isolates CF patient *P. aeruginosa* biofilms

**Table S1. *P. aeruginosa* CF isolates identification and resistance index**

| Isolate No. | Gentamicin | Tobramycin | Amikacin   | Ofloxacin  | Ciprofloxacin | Ceftazidime | Cefepime   | Aztreonam  | Piperacillin | Pipera/Tazobactam | Imipenem   | Meropenem  |
|-------------|------------|------------|------------|------------|---------------|-------------|------------|------------|--------------|-------------------|------------|------------|
| 24          | Resistance | Resistance | Resistance | Resistance | Resistance    | Resistance  | Resistance | Resistance | Resistance   | Resistance        | Resistance | Resistance |
| 25          | Resistance | Resistance | Sensitive  | Resistance | Resistance    | Resistance  | Resistance | Resistance | Resistance   | Resistance        | Resistance | Resistance |
| 29          | Resistance | Resistance | Resistance | Resistance | Resistance    | Resistance  | Resistance | Resistance | Intermediate | Resistance        | Resistance | Resistance |
| 40          | Resistance | Resistance | Resistance | Resistance | Resistance    | Resistance  | Resistance | Resistance | Resistance   | Resistance        | Resistance | Resistance |
| 46          | Resistance | Sensitive  | Resistance | Resistance | Resistance    | Resistance  | Resistance | Resistance | Resistance   | Resistance        | Resistance | Resistance |
| 52          | Resistance | Resistance | Resistance | Resistance | Resistance    | Resistance  | Resistance | Resistance | Resistance   | Resistance        | Sensitive  | Resistance |
| 53          | Resistance | Resistance | Resistance | Resistance | Resistance    | Resistance  | Resistance | Resistance | Resistance   | Resistance        | Resistance | Resistance |
| 59          | Sensitive  | Sensitive  | Sensitive  | Resistance | Resistance    | Sensitive   | Sensitive  | Sensitive  | Sensitive    | Sensitive         | Sensitive  | Sensitive  |
| 71          | Sensitive  | Sensitive  | Resistance | Resistance | Resistance    | Sensitive   | Sensitive  | Sensitive  | Sensitive    | Sensitive         | Sensitive  | Sensitive  |
| 72          | Resistance | Resistance | Resistance | Resistance | Resistance    | Resistance  | Resistance | Resistance | Resistance   | Resistance        | Resistance | Resistance |
| 82          | Resistance | Resistance | Sensitive  | Sensitive  | Sensitive     | Resistance  | Resistance | Resistance | Resistance   | Resistance        | Resistance | Resistance |
| 94          | Resistance | Resistance | Resistance | Resistance | Resistance    | Resistance  | Resistance | Resistance | Resistance   | Resistance        | Resistance | Resistance |
| 95          | Resistance | Resistance | Resistance | Resistance | Resistance    | Resistance  | Resistance | Resistance | Resistance   | Resistance        | Resistance | Resistance |
| 99          | Sensitive  | Sensitive  | Sensitive  | Sensitive  | Sensitive     | Sensitive   | Sensitive  | Sensitive  | Sensitive    | Sensitive         | Sensitive  | Sensitive  |
| 172         | Resistance | Resistance | Resistance | Resistance | Resistance    | Resistance  | Resistance | Resistance | Resistance   | Resistance        | Resistance | Resistance |
| 238         | Resistance | Resistance | Resistance | Resistance | Resistance    | Resistance  | Resistance | Resistance | Resistance   | Resistance        | Resistance | Resistance |
| 251         | Resistance | Resistance | Resistance | Resistance | Resistance    | Resistance  | Resistance | Resistance | Resistance   | Resistance        | Resistance | Resistance |
| 629         | Sensitive  | Resistance | Sensitive  | Sensitive  | Sensitive     | Resistance  | Resistance | Resistance | Resistance   | Sensitive         | Resistance | Resistance |
| 895         | Resistance | Resistance | Resistance | Resistance | Resistance    | Resistance  | Resistance | Resistance | Resistance   | Resistance        | Resistance | Resistance |
| 896         | Sensitive  | Sensitive  | Sensitive  | Sensitive  | Sensitive     | Sensitive   | Sensitive  | Sensitive  | Sensitive    | Sensitive         | Sensitive  | Sensitive  |
| 995         | Resistance | Resistance | Resistance | Resistance | Resistance    | Resistance  | Resistance | Sensitive  | Resistance   | Resistance        | Resistance | Resistance |

■ - Sensitive ■ - Intermediate ■ - Resistance

Identification and susceptibility were conducted by BD Phoenix™ automated identification and susceptibility testing system

**Table S2: Susceptibility test parameters of the Phoenix system**

| <b>Drug class</b> | <b>Drug name</b>      | <b>Drug range</b> | <b>MIC (S)</b> | <b>MIC (I)</b> | <b>MIC (R)</b> |
|-------------------|-----------------------|-------------------|----------------|----------------|----------------|
| Aminoglycoside    | Gentamicin            | 0.25-16           | ≤4             | 8              | ≥16            |
| Aminoglycoside    | Tobramycin            | 0.12-16           | ≤4             | 8              | ≥16            |
| Aminoglycoside    | Amikacin              | 0.5-64            | ≤16            | 32             | ≥64            |
| 5-Fluoroquinolone | Ofloxacin             | 0.25-8            | ≤2             | 4              | ≥8             |
| 5-Fluoroquinolone | Ciprofloxacin         | 0.25-4            | ≤1             | 2              | ≥4             |
| Cephem            | Ceftazidime           | 0.5-64            | ≤8             | 16             | ≥32            |
| Cephem            | Cefepime              | 0.5-64            | ≤8             | 16             | ≥32            |
| Monobactam        | Aztreonam             | 0.5-64            | ≤8             | 16             | ≥32            |
| B-Lactam Pen      | Piperacillin          | 0.5-128           | ≤16            | 32-64          | ≥128           |
| B-Lac/B-Lac. Inh  | Pipera/<br>Tazobactam | 0.5/4-<br>128/4   | ≤13            | 32-64          | ≥128           |
| Carbapenem        | Imipenem              | 1-16              | ≤14            | 4              | ≥8             |
| Carbapenem        | Meropenem             | 0.25-16           | ≤15            | 4              | ≥8             |

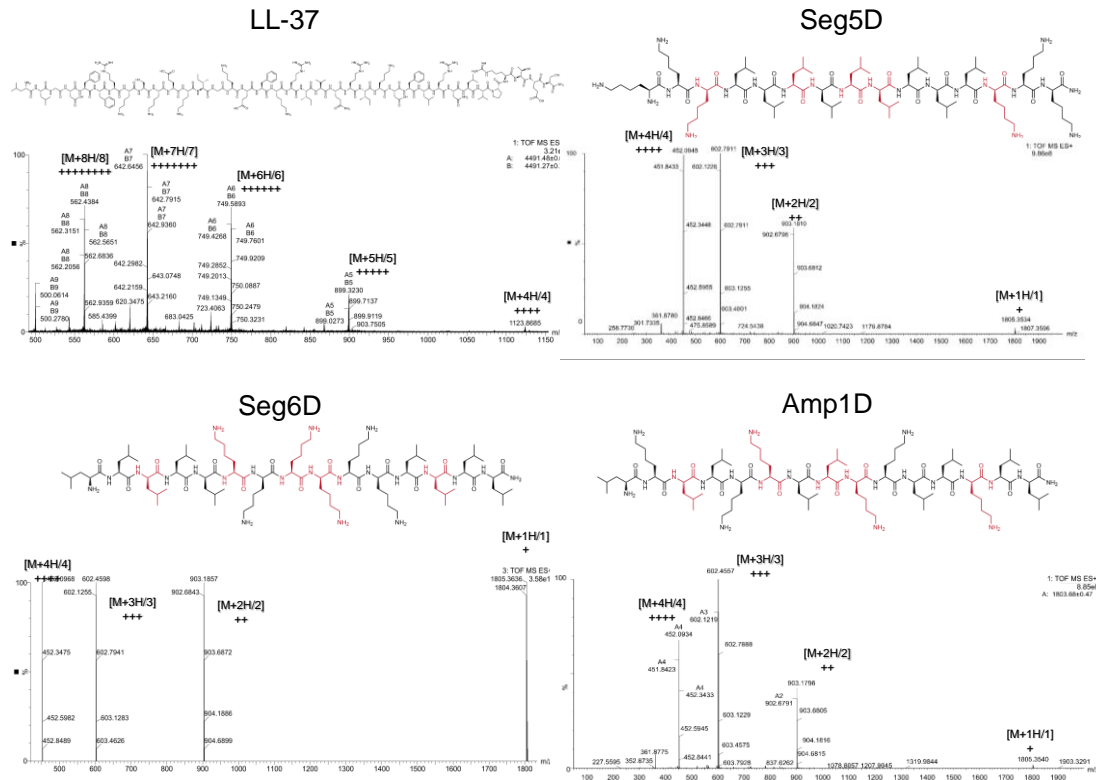

**Figure S1: Mass spectrum of peptides**

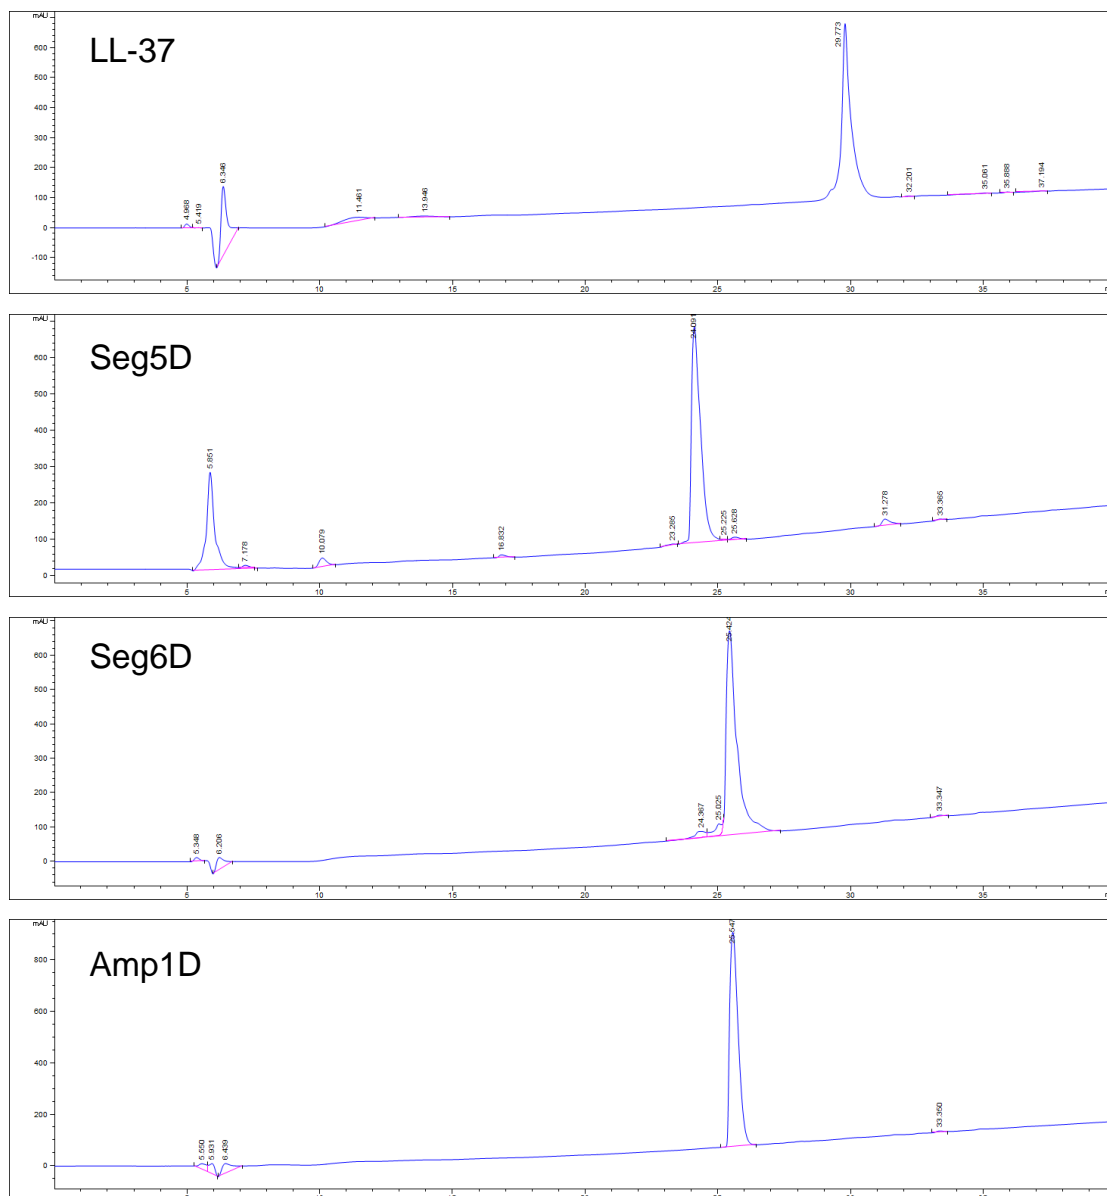

**Figure S2: Analytical HPLC chromatograms of peptides**

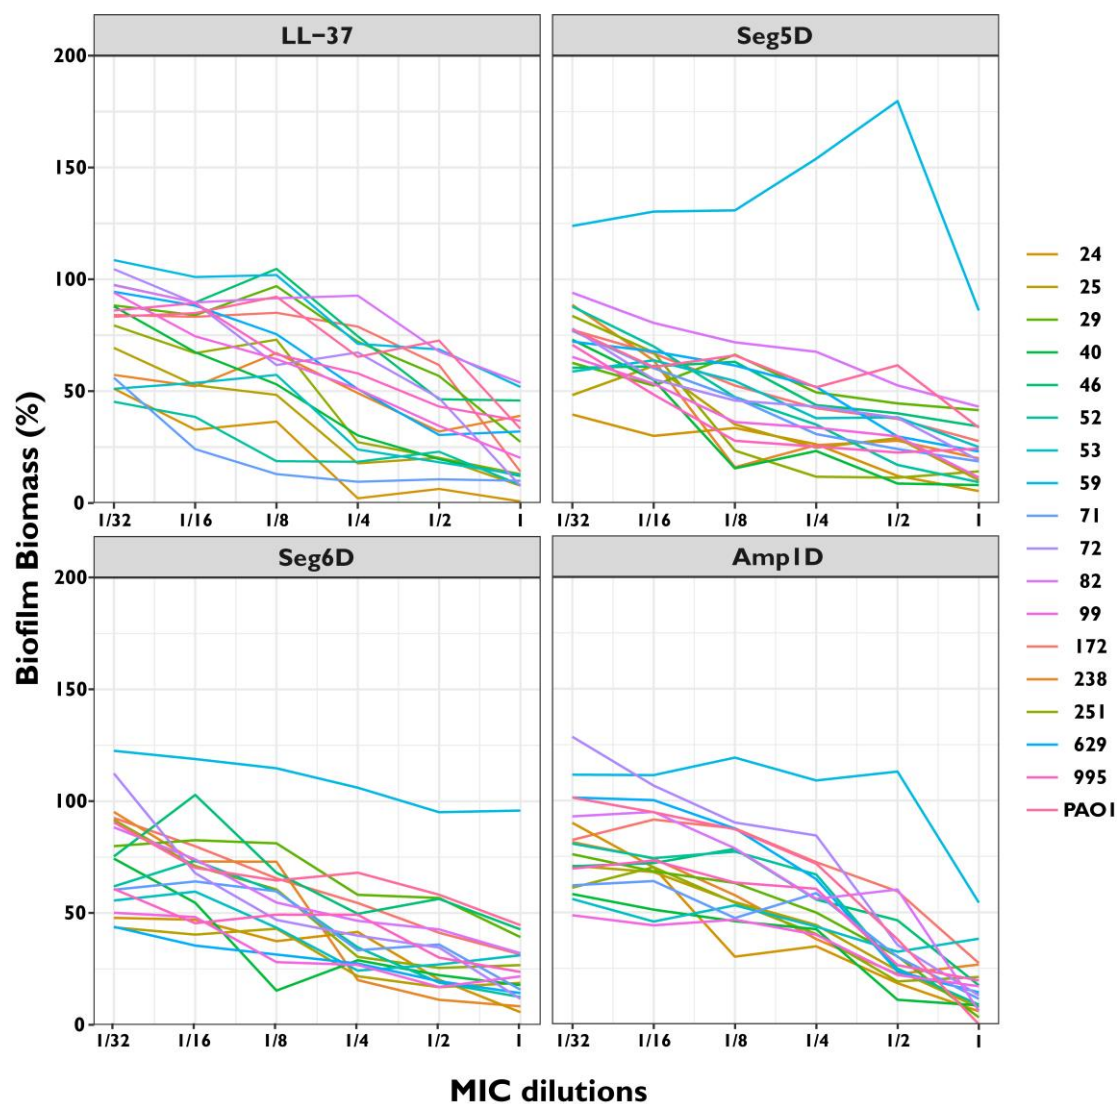

**Figure S3.** Inhibition of clinical CF patient isolates *P. aeruginosa* biofilm formations at sub-inhibitory concentration of AMPs. *P. aeruginosa* bacteria were incubated for 24 h in the presence of AMPs (at MIC dilutions). Surface-associated biofilm after treatment was examined using 0.1% CV staining followed by absorbance measurements at 590 nm. Results are reported relative to untreated biofilm. Each graph represents an isolated sample (shows in the left bottom of each graph). Background measurement with no added bacteria were performed as blank.

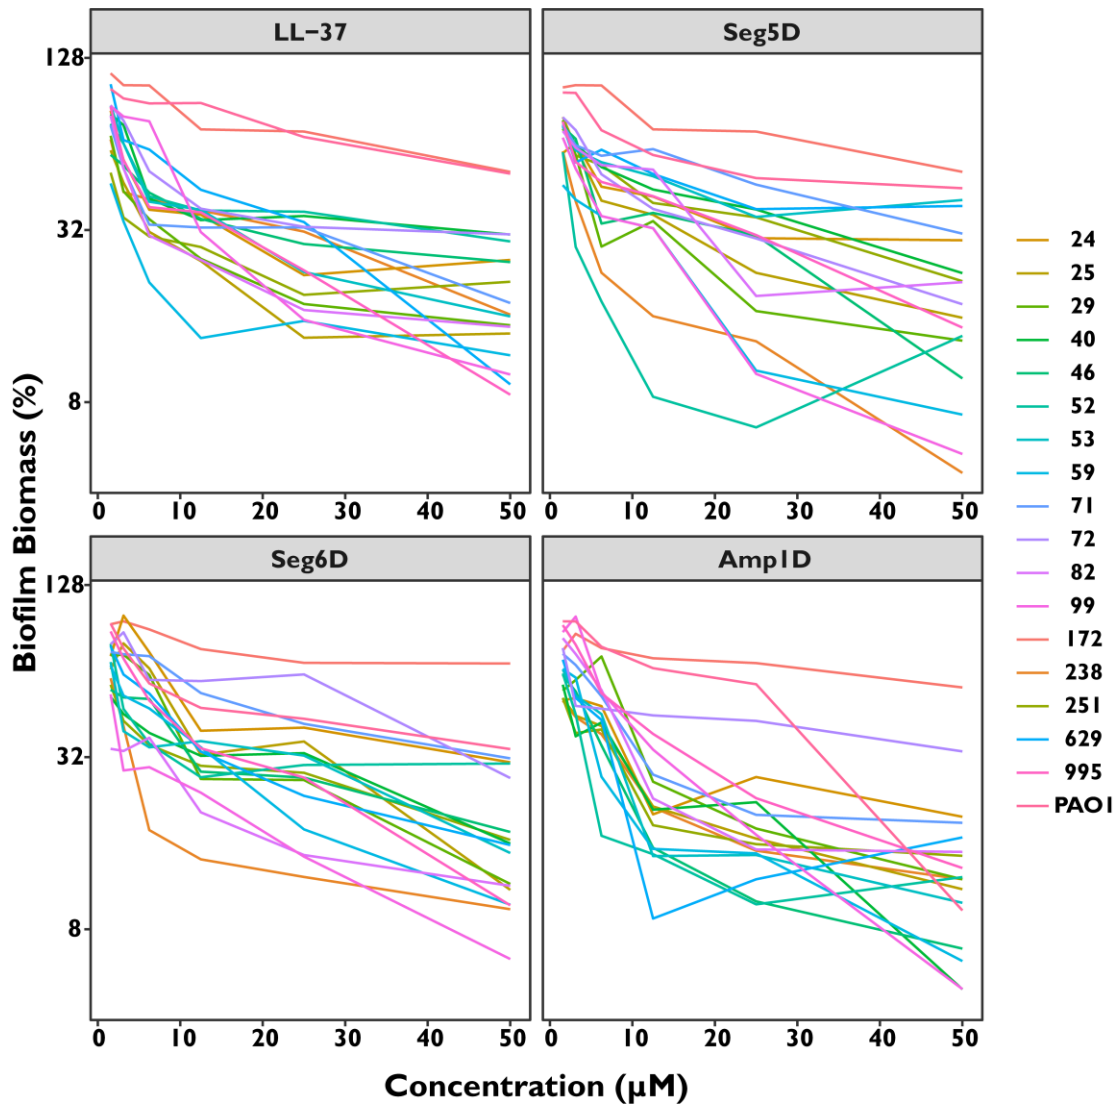

**Figure S4.** D,L-K<sub>6</sub>L<sub>9</sub> peptides and LL-37 degrade established clinical isolates CF patient *P. aeruginosa* biofilms. *P. aeruginosa* bacteria were allowed to grow for 24-h and treated for 1-hour with peptides in a serial dilution concentrations. Surface-associated biofilm after treatment, examined using 0.1% CV staining followed by absorbance measurements at 590 nm. Results are reported relative to untreated biofilm. Each graph represent isolated sample (shows in the left bottom of each graph). Background measurement with no added bacteria were performed as blank
